# Supplementary material
Source: PubMed Central journal article supplement (PMC1624859)
Supplement: mbc_E06-05-0410_1.pdf [file mbc_E06-05-0410_1.pdf]

**Supplementary Table 1.** Mutations in *gga2-ts* alleles

| <i>GGA2</i> alleles | Mutated residues                |
|---------------------|---------------------------------|
| <i>gga2-2</i>       | L47P                            |
| <i>gga2-4</i>       | L84S, Y96C, L121S, E137G        |
| <i>gga2-10</i>      | N74S, A83D                      |
| <i>gga2-13</i>      | L43S, I102T                     |
| <i>gga2-14</i>      | K29R, H78Y, C94S                |
| <i>gga2-21</i>      | N73D, N74S, K113E, K143R        |
| <i>gga2-32</i>      | C142R, L161S                    |
| <i>gga2-33</i>      | H78R, F115Y, S124F              |
| <i>gga2-45</i>      | I102S, K162E                    |
| <i>gga2-47</i>      | V91D, M151V                     |
| <i>gga2-54</i>      | I81T, V89A, I134V, Q139R, Y147V |
